# Supplementary material for: Disparities Between People with Diabetic Retinopathy and Community Health Service Centers’ Staff in Estimating Satisfaction with Telescreening for Diabetic Eye Diseases
Source: Research Square preprint supplement (doi:10.21203/rs.3.rs-196316/v1), 2021-02-16
Supplement: Supplementary file 1 [file 3c2ba051c58faba2c0fe477c.pdf]

**Supplemental Table 1.** Different forms of ophthalmic medical service in the community health service centers

|                                                     | District (No. [%]) |             |                        | Total     |
|-----------------------------------------------------|--------------------|-------------|------------------------|-----------|
|                                                     | Urban area         | Suburb area | Semi-urban suburb area |           |
| <b>CHSCs</b>                                        | 74 (31.6)          | 86 (36.7)   | 74 (31.6)              | 234       |
| <b>Independent ophthalmic clinics</b>               | 18 (24.3)          | 7 (8.1)     | 24 (32.4)              | 49 (20.9) |
| <b>Ophthalmic and ENT comprehensive clinics</b>     | 43 (58.1)          | 20 (23.3)   | 15 (20.3)              | 78 (33.3) |
| <b>Ophthalmologists from the superior hospitals</b> | 19 (25.7)          | 13 (15.1)   | 15 (20.3)              | 47 (20.1) |
| <b>No eye care service</b>                          | 9 (12.2)           | 52 (60.5)   | 28 (37.8)              | 89 (38.0) |

CHSCs, community health service centers; ENT, ear, nose, and throat.
