# Supplementary material for: Disparities Between People with Diabetic Retinopathy and Community Health Service Centers’ Staff in Estimating Satisfaction with Telescreening for Diabetic Eye Diseases
Source: Research Square preprint supplement (doi:10.21203/rs.3.rs-196316/v1), 2021-02-16
Supplement: Supplementary file 2 [file 61513c5d6aa6e403bb2fb95a.pdf]

**Supplemental Table 2.** Prevention and treatment of diabetic eye disease in the community health service centers

| Prevention and treatment of diabetic eye<br>disease in community | District (No. [%]) |                |                           | Total      |
|------------------------------------------------------------------|--------------------|----------------|---------------------------|------------|
|                                                                  | Urban<br>area      | Suburb<br>area | Semi-urban<br>suburb area |            |
| CHSCs                                                            | 74                 | 86             | 74                        | 234        |
| Integrated into services of general practitioner                 | 41 (55.4)          | 19 (22.1)      | 20 (27.0)                 | 80 (34.2)  |
| Integrated into services of family doctor                        | 32 (43.2)          | 14 (16.3)      | 20 (27.0)                 | 66 (28.2)  |
| Bilateral cooperation with the superior<br>medical institution   | 64 (86.5)          | 55 (64.0)      | 41 (55.4)                 | 160 (68.4) |

CHSCs, community health service centers.
