# Supplementary material for: Disparities Between People with Diabetic Retinopathy and Community Health Service Centers’ Staff in Estimating Satisfaction with Telescreening for Diabetic Eye Diseases
Source: Research Square preprint supplement (doi:10.21203/rs.3.rs-196316/v1), 2021-02-16
Supplement: Supplementary file 3 [file 6967ecf0db6fa7a6fc017898.pdf]

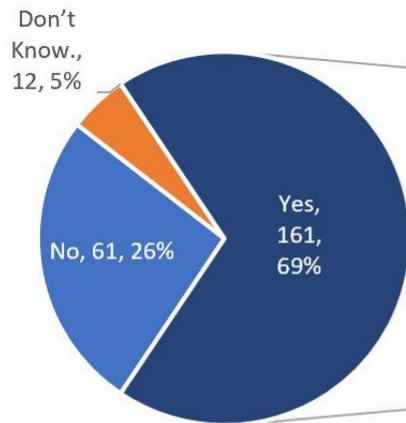

Can telescreening for DR be combined with other community health work?

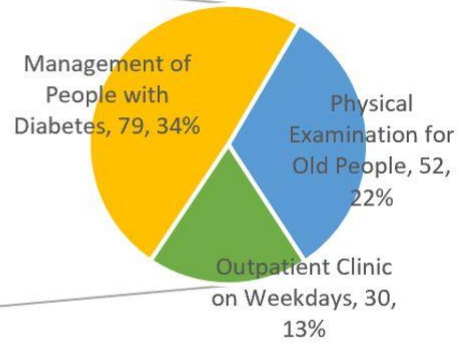

If yes, which kind of work can be combined with telescreening for DR?
